# Supplementary material for: Ferroelectric polarization-modulated two-dimensional homojunctions for enhanced nonvolatile multistate memory with self-powered optical readout capacity
Source: Royal Society of Chemistry journal article supplement (doi:10.1039/d4tc04349a), 2024-12-18
Supplement: d4tc04349a1.pdf [file d4tc04349a1.pdf]

## Supporting Information

### **Ferroelectric polarization-modulated two-dimensional homojunctions for enhanced nonvolatile multistate memory with self-powered optical readout capacity**

*Yating Wang<sup>1</sup> and Pengfei Hou<sup>1,\*</sup>*

*<sup>1</sup> School of Materials Science and Engineering, Xiangtan University, Hunan Xiangtan  
411105, China (houpf@xtu.edu.cn)*

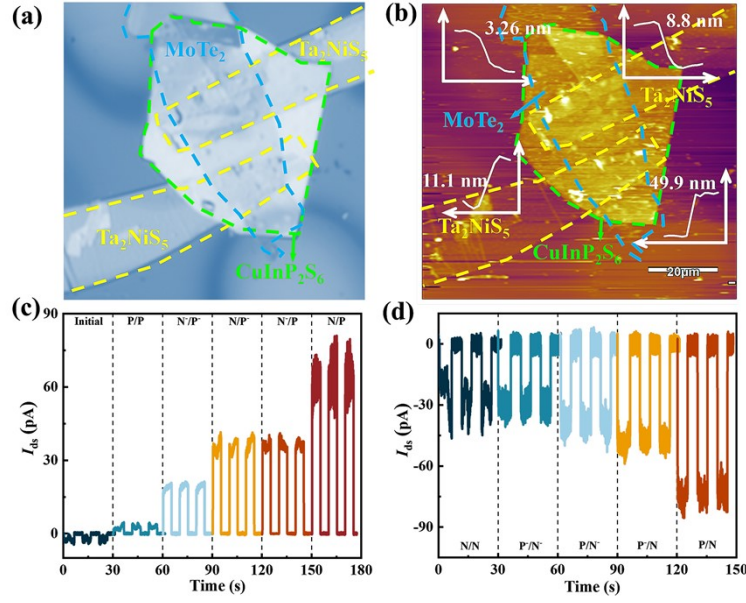

**Figure S1.** (a) The optical image. (b) The AFM image show the device with a thickness of 3.26 nm for MoTe<sub>2</sub>. The insets show the thickness of MoTe<sub>2</sub>, CuInP<sub>2</sub>S<sub>6</sub> and Ta<sub>2</sub>NiS<sub>5</sub> nanoflakes, respectively. (c, d) the  $I$ - $t$  characteristics under different states. All measurements were performed at 660 nm, an intensity of 7.96 mW/cm<sup>2</sup> and zero bias.

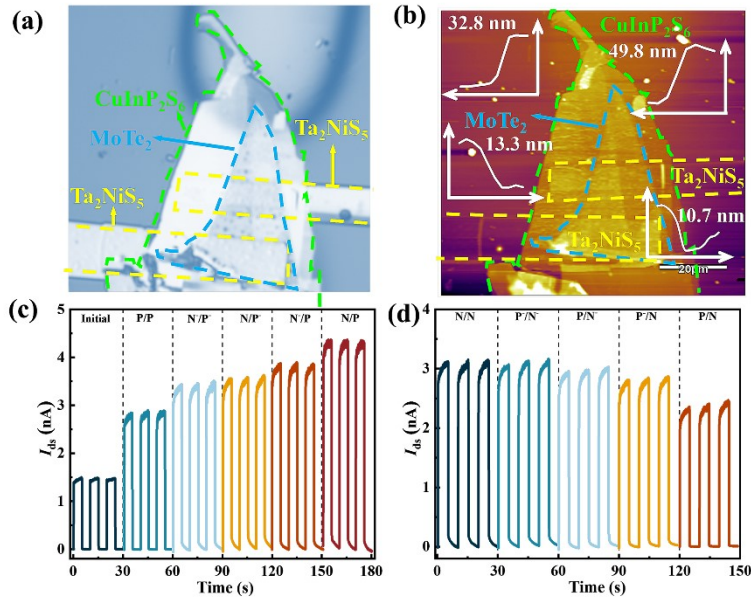

**Figure S2.** (a) The optical image. (b) The AFM image show the device with a thickness of 32.8 nm for MoTe<sub>2</sub>. The insets show the thickness of MoTe<sub>2</sub>, CuInP<sub>2</sub>S<sub>6</sub> and Ta<sub>2</sub>NiS<sub>5</sub> nanoflakes, respectively. (c, d) the  $I$ - $t$  characteristics under different states. All measurements were performed at 660 nm, an intensity of 7.96 mW/cm<sup>2</sup> and zero bias.

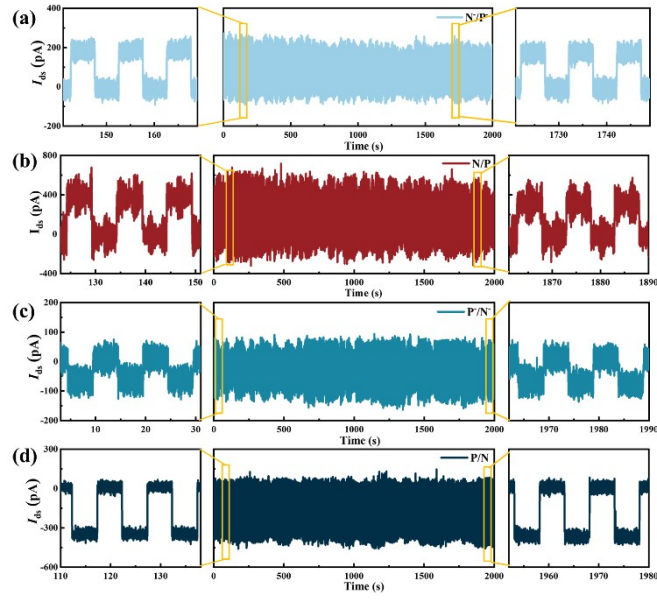

**Figure S3.** Retention performance of device in four different states, namely N<sup>-</sup>/P<sup>-</sup> (a), N/P (b), P<sup>-</sup>/N<sup>-</sup> (c), and P/N(d). All measurements were performed at 660 nm, intensity of 7.96 mW/cm<sup>2</sup> and zero bias.
